# Supplementary material
Source: PubMed Central journal article supplement (PMC11029171)
Supplement: 262_2016_1904_MOESM1_ESM.pdf [file 262_2016_1904_MOESM1_ESM.pdf]

**Supplemental Table 1.** Individual KIR-ligand genotype alone is not associated with patient outcome.

| Maximum tumor shrinkage |         |       |          | Progression-free survival |             |                              |               | Overall survival |             |                             |                  |      |
|-------------------------|---------|-------|----------|---------------------------|-------------|------------------------------|---------------|------------------|-------------|-----------------------------|------------------|------|
| n                       | Mean(%) | SD(%) | p-value* | n                         | # of Events | Median PFS (95% CI) (months) | p-value*      | n                | # of Events | Median OS (95% CI) (months) | p-value*         |      |
| HLA-C genotype          |         |       |          |                           |             |                              |               |                  |             |                             |                  |      |
| HLA-C1/C1               | 36      | 7.2   | 73.2     | 37                        | 36          | 4.0 (1.6-7.5)                |               | 37               | 26          | 43.1 (13.7-56.0)            |                  |      |
| HLA-C1/C2               | 50      | 18.8  | 59.3     | 0.68                      | 51          | 46                           | 4.4 (2.5-6.2) | 0.74             | 51          | 33                          | 42.6 (27.2-73.4) | 0.46 |
| HLA-C2/C2               | 17      | 8.9   | 55.8     |                           | 17          | 15                           | 2.8 (2.3-7.0) |                  | 17          | 11                          | 52.6 (16.0-INF)  |      |
| HLA-C1+                 | 86      | 14.0  | 65.3     | 0.77                      | 88          | 82                           | 4.2 (2.5-5.3) | 0.87             | 88          | 59                          | 42.6 (27.2-54.1) | 0.73 |
| HLA-C1-                 | 17      | 8.9   | 55.8     |                           | 17          | 15                           | 2.8 (2.3-7.0) |                  | 17          | 11                          | 52.6 (16.0-INF)  |      |
| HLA-C2-                 | 36      | 7.2   | 73.2     | 0.49                      | 37          | 36                           | 4.0 (1.6-7.5) | 0.50             | 37          | 26                          | 43.1 (13.7-56.0) | 0.22 |
| HLA-C2+                 | 67      | 16.3  | 58.2     |                           | 68          | 61                           | 4.2 (2.5-5.3) |                  | 68          | 44                          | 45.3 (36.1-61.1) |      |
| HLA-B genotype          |         |       |          |                           |             |                              |               |                  |             |                             |                  |      |
| HLA-Bw4+                | 73      | 14.4  | 60.4     | 0.75                      | 74          | 66                           | 3.9 (2.4-5.3) | 0.43             | 74          | 47                          | 42.8 (28.4-54.1) | 0.49 |
| HLA-Bw4-                | 30      | 10.0  | 71.9     |                           | 31          | 31                           | 4.4 (2.3-7.5) |                  | 31          | 23                          | 43.1 (20.2-61.9) |      |
| 2DL1+ patients          |         |       |          |                           |             |                              |               |                  |             |                             |                  |      |
| 2DL1-ligand present     | 65      | 16.8  | 59.0     | 0.54                      | 66          | 59                           | 4.3 (2.5-5.7) | 0.52             | 66          | 42                          | 47.7 (36.1-61.1) | 0.23 |
| 2DL1-ligand missing     | 35      | 8.5   | 73.9     |                           | 36          | 35                           | 4.1 (1.6-7.5) |                  | 36          | 25                          | 43.1 (15.2-56.0) |      |
| 2DL2/3+ patients        |         |       |          |                           |             |                              |               |                  |             |                             |                  |      |
| 2DL2/3-ligand present   | 86      | 14.0  | 65.3     | 0.77                      | 88          | 82                           | 4.2 (2.5-5.3) | 0.87             | 88          | 59                          | 42.6 (27.2-54.1) | 0.73 |
| 2DL2/3-ligand missing   | 17      | 8.9   | 55.8     |                           | 17          | 15                           | 2.8 (2.3-7.0) |                  | 17          | 11                          | 52.6 (16.0-INF)  |      |
| 3DL1+ patients          |         |       |          |                           |             |                              |               |                  |             |                             |                  |      |
| 3DL1-ligand present     | 70      | 14.0  | 60.3     | 0.77                      | 71          | 63                           | 3.7 (2.3-4.8) | 0.48             | 71          | 45                          | 42.8 (28.4-52.6) | 0.49 |
| 3DL1-ligand missing     | 30      | 10.0  | 71.9     |                           | 31          | 31                           | 4.4 (2.3-7.5) |                  | 31          | 23                          | 43.1 (20.2-61.9) |      |

\* Linear regression models were used for maximum tumor shrinkage analyses; Log-rank tests and Cox proportional hazards regression models were used for PFS and OS analyses.
